# Supplementary material for: Novel thermally activated delayed fluorescence materials by high-throughput virtual screening: going beyond donor–acceptor design
Source: Royal Society of Chemistry journal article supplement (doi:10.1039/d1tc00002k), 2021-01-01
Supplement: d1tc00002k1.pdf [file d1tc00002k1.pdf]

## Electronic Supplementary Information (ESI)

# **Novel thermally activated delayed fluorescence materials by high-throughput virtual screening: going beyond donor-acceptor design**

Ke Zhao, <sup>\*a</sup> Ömer H. Omar, <sup>b</sup> Tahereh Nematiamram, <sup>b</sup> Daniele Padula, <sup>c</sup> Alessandro Troisi <sup>\*b</sup>

<sup>a</sup> School of Physics and Electronics, Shandong Normal University, Jinan, 250358, China.

E-mail: zhaoke@sdu.edu.cn

<sup>b</sup> Department of Chemistry and Materials Innovation Factory, University of Liverpool, Liverpool, L69 7ZD, U. K. E-mail: atroisi@liverpool.ac.uk

<sup>c</sup> Dipartimento di Biotecnologie, Chimica e Farmacia, Università di Siena, via A. Moro 2, 53100, Siena, Italy

### **Table of Contents**

1. Calibration
2. Convergence problem
3. Whole image of calculation
4. HOMO/LUMO orbitals of XOTCUF
5. Design for improving property (acceptor number and isomerism effects)
6. Information of candidates

References

## 1. Calibration

We have constructed a large database of 100 singlet and triplet experimental excitation energies using data from the literature.<sup>1</sup> Through comparison between the calculated and experimental excited state energies, the calibration was established. The energy of the singlet excited state  $S_1$  is calculated at M06-2X/def2-TZVP level. The energy of the triplet excited state  $T_1$  is calculated by TDDFT and  $\Delta$ SCF<sup>2,3</sup> methods respectively. The comparison between experimental and computational data by two methods are shown in Fig. S1. It has been proved the calibration methodology is very useful for prediction the singlet fission molecules.<sup>3</sup>

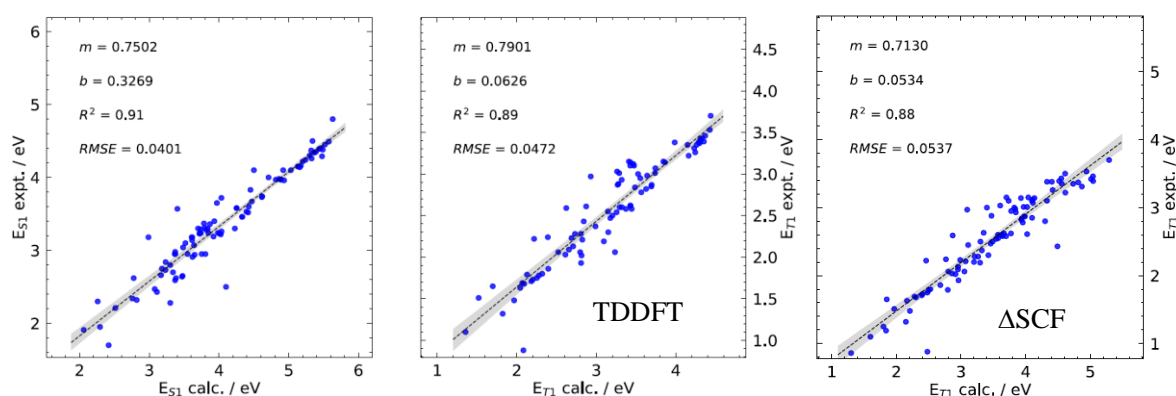

**Fig. S1** Comparison between calculated (M06-2X/def2-TZVP) and experimental  $S_1$  (left) and  $T_1$  energies for TDDFT (middle) and  $\Delta$ SCF (right) methods. Shade areas represent a 95% confidence interval. We calibrated the calculations to experimental data with a linear fit (*i.e.*  $y=mx+b$ ), and we provide two metrics for the quality of the fit (squared correlation coefficient,  $R^2$ , and root mean squared error, RMSE).

## 2. Convergence problem

Using  $\Delta$ SCF method to calculate triplet energy should be slightly more accurate than TDDFT, but it has some convergence problems. When we calculate the singlet point energy of  $T_1$  state for X-ray structure, it may occasionally converge on an excited state due to the poor orbital guess. We carefully examined some molecules calculation in the long-list and found the convergence problems. Several examples with  $T_1$  energies calculated by  $\Delta$ SCF and TDDFT are shown in Fig. S2. For these molecules, the calculated  $\Delta$ SCF triplet energy  $E_{x,scf}(T_1)$  is unreasonably high. We also noticed a number of instances where molecules formed by weakly interacting identical conjugated fragments, such as COXJAC and ANEWEX, had multi-configurational triplets that could not be studied accurately well within an unrestricted SCF calculation.

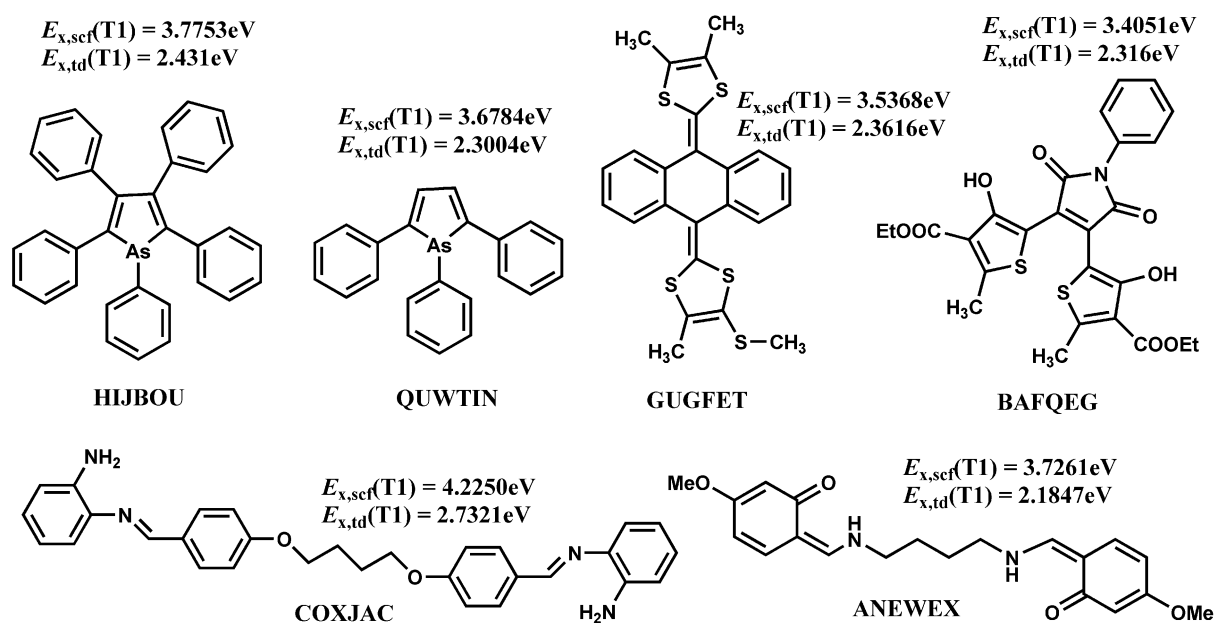

**Fig. S2** The  $E_{x,scf}(T_1)$  and  $E_{x,td}(T_1)$  for the molecules having convergence problem.

### 3. Whole image of calculation

According to two strategies, we selected 698 molecules to perform accurate calculation. Fig. S3 gives the calibrated excitation energies of X-ray and optimized structures for all of the 698 molecules. Each point represents a series of calculation for one structure. From the Figure S3, we can see the whole  $S_1$  and  $T_1$  energy distribution and the energy changes before and after optimization for 698 molecules. From the 698 molecules, we identified 125 TADF candidates satisfying our energy criteria. The calibrated energies of the 125 candidates are plotted in Fig. S4. The red points, which denote the calibrated energies of optimized geometries are all located in the gray shaded area, that is, the range of  $-0.4\text{ eV} < E(S_1)' - E(T_1)' < 0.4\text{ eV}$ .

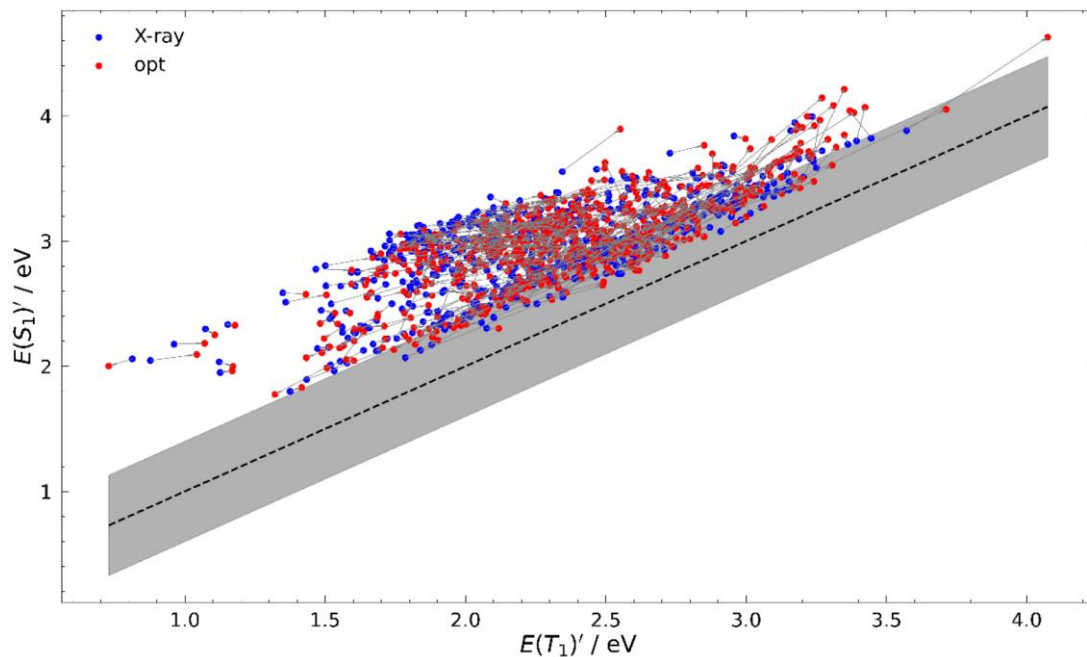

**Fig. S3** The calibrated excitation energies of X-ray (blue points) and optimized structures (red points) for the 698 molecules. The gray shaded area identifies the range of  $-0.4 \text{ eV} < E(S_1)' - E(T_1)' < 0.4 \text{ eV}$ .

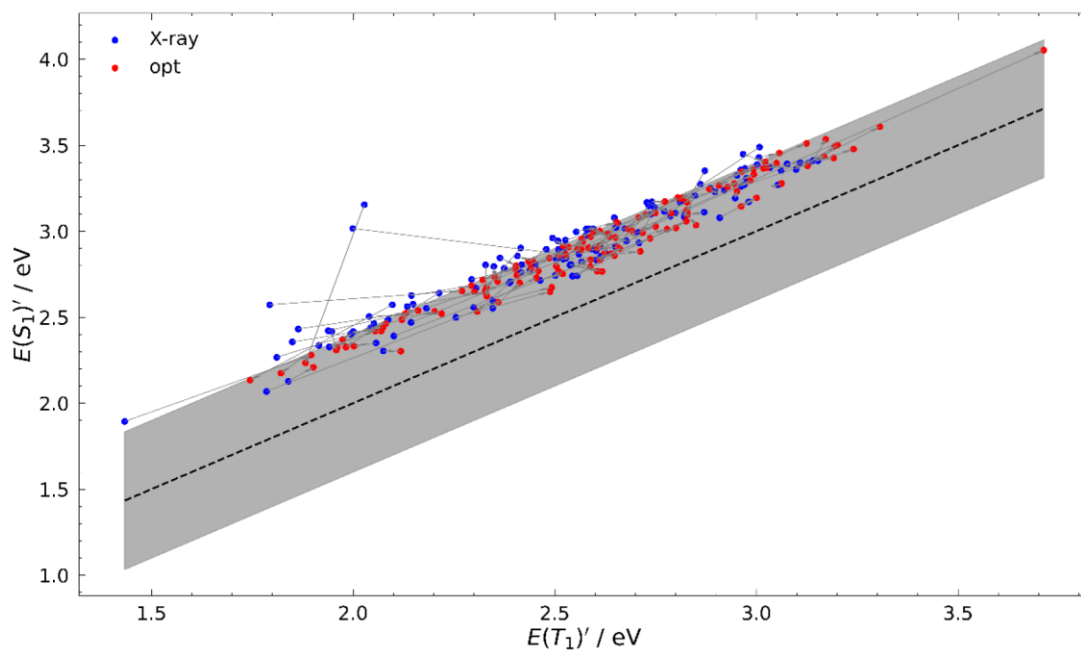

**Fig. S4** The calibrated excitation energies of X-ray (blue points) and optimized structures (red points) for the 125 candidates. The gray shaded area identifies the range of  $-0.4 \text{ eV} < E(S_1)' - E(T_1)' < 0.4 \text{ eV}$ .

#### 4. HOMO/LUMO orbitals of XOTCUF

The optimized geometry and the HOMO and LUMO orbitals are given in Fig. S5. From the side view, one can see that the molecule has a planar backbone. HOMO/LUMO distribution is

well separated and the small overlap localized on the central benzene ring. This indicates that the donor, acceptor and linker balance very well to obtain a small  $\Delta E_{ST}$  in a coplanar molecule.

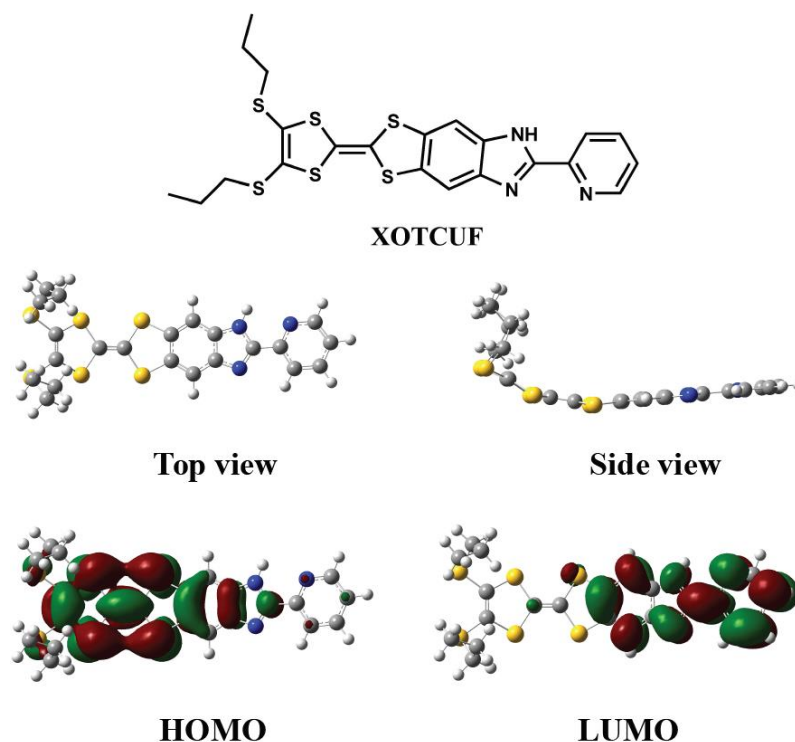

**Fig. S5** The optimized geometry and HOMO/LUMO orbitals of XOTCUF molecule.

### 5. Design for improving property (acceptor number and isomerism effects)

WANTIQU has two isomers. One has a nearly linear backbone, and the other has a V-shaped conformation which corresponds to the X-ray structure. The calculated energy gap  $\Delta E_{ST}$  and oscillator strength  $f$  of the two isomers are shown in Fig. S6. It is found that the linear structure has stronger oscillator strength due to the enhanced conjugation, but the  $\Delta E_{ST}$  is larger than our criterion. Then we added more cyano units to modulate the charge transfer property. The results show that with the increase of cyano units, the  $\Delta E_{ST}$  and the  $f$  decrease for both linear and V-shaped structures. The linear structure with three cyano units has a small  $\Delta E_{ST}$  with a considerable  $f$ . It is expected that this structure could have better performance than the original WANTIQU molecule.

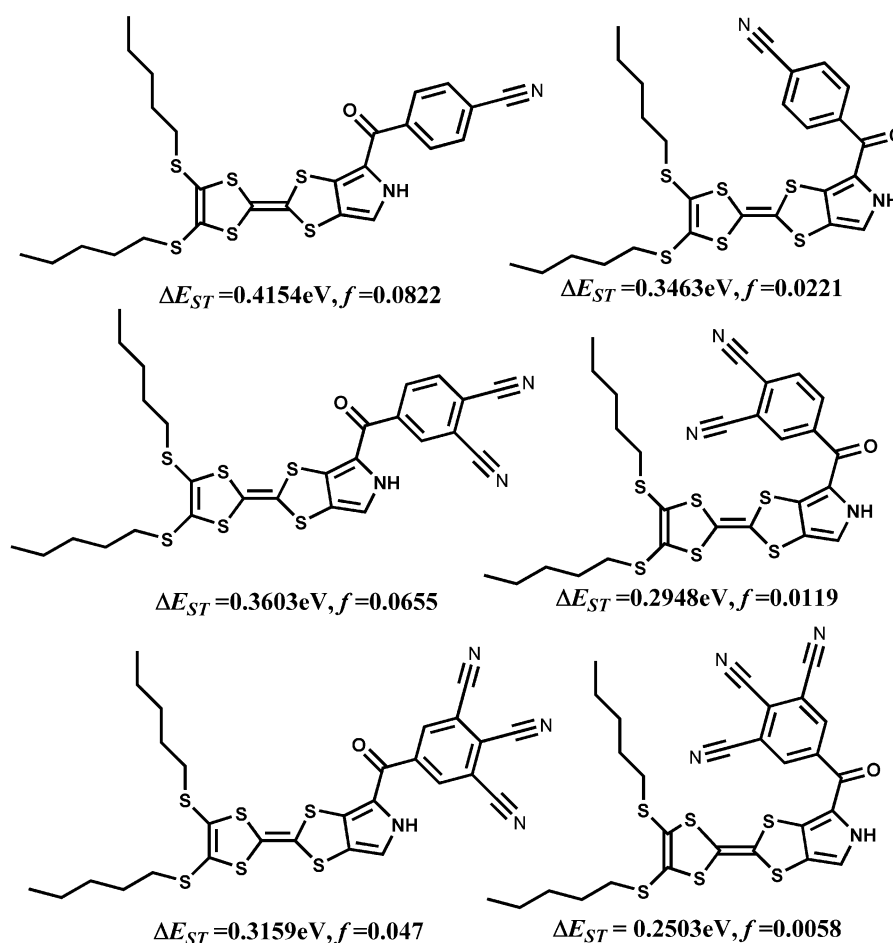

**Fig. S6** Isomerism effects on the energy gap  $\Delta E_{ST}$  and the oscillator strength  $f$  for the structures related to WANTIQ.

The calculated frontier orbitals of the ZERJEL02 and the corresponding designed molecules are presented in Fig. S7. In the designed molecules, the HOMO orbitals are more localized on the sulfur atoms and farther away from the central benzene ring, which makes the overlap of HOMO and LUMO orbitals smaller than that of the ZERJEL02 molecule. Therefore, both the energy gaps and the oscillator strengths of the designed structures decrease significantly, but their oscillator strengths are still larger than 0.02.

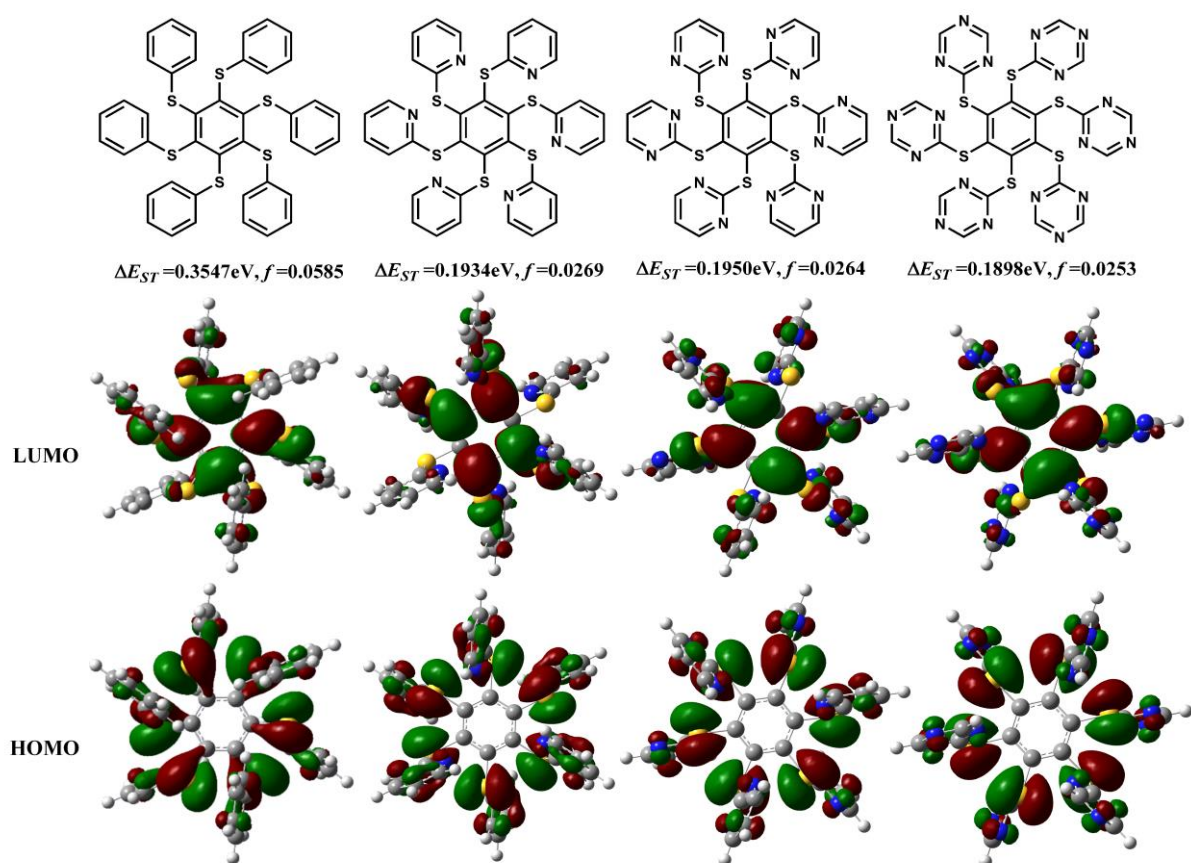

**Fig. S7** Comparison of the HOMO/LUMO orbitals between the ZERJEL02 and the corresponding designed molecules.

## 6. Information of candidates

125 TADF candidates are found by our high-throughput virtual screening process and we grouped them into seven types. Their key information is listed in Table S1 and their chemical structures are illustrated in Table S2.

**Table S1.** The key information of the 125 molecules.

| Type | No. | CSD ID | $E_0(S_1)$<br>(eV) | $E_{0,td}(T_1)$<br>(eV) | $\Delta E_{ST}$<br>(eV) | $f$<br>( $S_0 \rightarrow S_1$ ) | $\langle S_1   H_{so}   T_1 \rangle$<br>( $\text{cm}^{-1}$ ) | $\langle T_1   H_{so}   S_0 \rangle$<br>( $\text{cm}^{-1}$ ) |
|------|-----|--------|--------------------|-------------------------|-------------------------|----------------------------------|--------------------------------------------------------------|--------------------------------------------------------------|
| I    | 1   | FARHEO | 3.2509             | 3.2340                  | 0.1479                  | 0.0004                           | 0.0498                                                       | 0.5043                                                       |
|      | 2   | HIFJOY | 3.7558             | 3.6699                  | 0.1823                  | 0.0002                           | 0.0669                                                       | 1.9700                                                       |
|      | 3   | EXAMUN | 3.6110             | 3.5283                  | 0.1856                  | 0                                | 0.0022                                                       | 1.6440                                                       |
|      | 4   | TEGVAF | 3.2528             | 3.2183                  | 0.1618                  | 0                                | 0.0494                                                       | 1.7737                                                       |
|      | 5   | IVETAG | 3.3387             | 3.2267                  | 0.2196                  | 0                                | 0.0031                                                       | 1.0967                                                       |
|      | 6   | VENXAQ | 3.3436             | 3.1976                  | 0.2462                  | 0                                | 0.0082                                                       | 0.7674                                                       |
|      | 7   | YUGDOV | 3.2921             | 3.0897                  | 0.2929                  | 0.1017                           | 0.1163                                                       | 1.7923                                                       |
|      | 8   | TESJEJ | 2.9241             | 2.7296                  | 0.3013                  | 0.0001                           | 0.0242                                                       | 1.4939                                                       |
|      | 9   | TURBOZ | 3.4524             | 3.2238                  | 0.3072                  | 0.1602                           | 0.0110                                                       | 0.3300                                                       |
|      | 10  | KETKAY | 3.4394             | 3.1283                  | 0.3729                  | 0                                | 0.0073                                                       | 0.7529                                                       |
|      | 11  | BICQEM | 3.1010             | 2.7940                  | 0.3831                  | 0.0006                           | 0.0128                                                       | 1.2314                                                       |
| II   | 12  | FECGOL | 3.3742             | 3.2720                  | 0.2104                  | 0.0001                           | 0.0155                                                       | 2.2678                                                       |
|      | 13  | ONAHIW | 3.5822             | 3.3140                  | 0.3333                  | 0.0802                           | 0.5233                                                       | 1.2267                                                       |
|      | 14  | IWOKUB | 3.4499             | 3.1109                  | 0.3945                  | 0.0379                           | 0.4789                                                       | 2.61E-11                                                     |
|      | 15  | SOHQAI | 3.8146             | 3.4802                  | 0.3763                  | 0.0059                           | 0.2017                                                       | 0.4653                                                       |
|      | 16  | XEXWIG | 3.3814             | 3.1202                  | 0.3358                  | 0.0542                           | 0.2370                                                       | 0.8860                                                       |
|      | 17  | TARNUW | 3.2538             | 3.0969                  | 0.2584                  | 0.0891                           | 0.1648                                                       | 0.4789                                                       |
|      | 18  | VIHGAU | 2.9307             | 2.6193                  | 0.3934                  | 0.0832                           | 0.9157                                                       | 3.9921                                                       |
|      | 19  | NUPIJR | 2.8165             | 2.5459                  | 0.3657                  | 0.084                            | 0.4324                                                       | 1.8390                                                       |
|      | 20  | RUPZIN | 3.7938             | 3.4308                  | 0.3997                  | 0.0402                           | 1.9308                                                       | 13.1256                                                      |
| III  | 21  | ILUBEY | 3.8227             | 3.7179                  | 0.1946                  | 0.0447                           | 0.1969                                                       | 0.3050                                                       |
|      | 22  | NEWKEH | 3.4310             | 3.2187                  | 0.2951                  | 0.0264                           | 0.6116                                                       | 1.8428                                                       |
|      | 23  | IKUZET | 2.7886             | 2.5214                  | 0.3642                  | 0.0457                           | 0.2244                                                       | 0.6297                                                       |
|      | 24  | DELJIQ | 3.4073             | 3.3537                  | 0.1707                  | 0.0011                           | 0.2917                                                       | 1.3882                                                       |
|      | 25  | HATXOP | 3.7251             | 3.4982                  | 0.2949                  | 0.0409                           | 1.3947                                                       | 3.5427                                                       |
|      | 26  | USINEQ | 4.1440             | 3.9305                  | 0.2676                  | 0.0104                           | 3.2622                                                       | 3.3611                                                       |



|     |    |        |        |        |        |        |         |          |
|-----|----|--------|--------|--------|--------|--------|---------|----------|
| III | 27 | XOTCUF | 3.1244 | 2.8708 | 0.3400 | 0.0106 | 1.5626  | 11.5206  |
|     | 28 | WANTIQ | 3.0932 | 2.8332 | 0.3463 | 0.0221 | 1.5476  | 6.3118   |
|     | 29 | VALTOT | 3.8907 | 3.5703 | 0.3622 | 0.0346 | 1.0914  | 2.4696   |
|     | 30 | NETZES | 3.6700 | 3.3485 | 0.3719 | 0.0048 | 30.3455 | 48.3766  |
|     | 31 | YAXXOK | 4.1015 | 3.7452 | 0.3822 | 0.0231 | 8.3677  | 5.1268   |
|     | 32 | OCUPEK | 4.0257 | 3.6719 | 0.3832 | 0.0373 | 46.6174 | 421.5681 |
|     | 33 | PEHJUK | 3.5994 | 3.4012 | 0.2773 | 0.0383 | 1.9866  | 3.2992   |
|     | 34 | KIRYEQ | 4.0710 | 3.8782 | 0.2542 | 0.0235 | 2.1805  | 1.4262   |
|     | 35 | YOZFOI | 3.7035 | 3.4501 | 0.3167 | 0.0162 | 8.6628  | 277.3763 |
|     | 36 | BUFFAJ | 3.9322 | 3.6485 | 0.3316 | 0.0243 | 3.9703  | 16.4099  |
|     | 37 | TUWPOS | 3.2202 | 2.9663 | 0.3364 | 0.0508 | 1.8239  | 2.3877   |
|     | 38 | NAYMIL | 3.8725 | 3.6568 | 0.2802 | 0.0332 | 1.1619  | 6.3505   |
|     | 39 | NAYZOF | 4.0518 | 3.7397 | 0.3492 | 0.1278 | 3.1538  | 4.3588   |
|     | 40 | TUWPEI | 3.7877 | 3.4995 | 0.3409 | 0.0367 | 3.2706  | 4.8605   |
|     | 41 | RALYIM | 4.0906 | 3.7808 | 0.3459 | 0.0396 | 19.6401 | 439.2552 |
| IV  | 42 | PIVXUO | 3.7135 | 3.5005 | 0.2844 | 0.0001 | 0.3255  | 5.31937  |
|     | 43 | ACUYOO | 3.3727 | 3.0978 | 0.3469 | 0.0433 | 2.1572  | 13.2937  |
|     | 44 | PUWNAX | 2.7893 | 2.5399 | 0.3501 | 0.0405 | 0.5668  | 2.9896   |
|     | 45 | FEJVAU | 3.5538 | 3.3601 | 0.2755 | 0.0297 | 0.8971  | 7.8389   |
|     | 46 | VEPZOI | 4.1691 | 3.7896 | 0.3978 | 0.0692 | 0.2387  | 2.1730   |
|     | 47 | XIDXUF | 3.0902 | 2.8677 | 0.3168 | 0.0012 | 4.7382  | 88.5777  |
|     | 48 | CAGZES | 3.2896 | 3.1969 | 0.2063 | 0.0208 | 0.3576  | 0.5863   |
|     | 49 | CAGZAO | 3.5219 | 3.2552 | 0.3345 | 0.0271 | 0.4034  | 0.7728   |
|     | 50 | RAFCOT | 3.0145 | 2.9074 | 0.2286 | 0.0057 | 0.2523  | 0.8009   |
|     | 51 | NERLEE | 2.5083 | 2.3274 | 0.3071 | 0.007  | 4.6969  | 18.6914  |
|     | 52 | QETPEN | 3.2554 | 3.0333 | 0.3099 | 0.0495 | 0.0648  | 0.2542   |
|     | 53 | LUBBAN | 3.6900 | 3.5013 | 0.2662 | 0.0085 | 0.1008  | 0.6520   |
|     | 54 | YASRAM | 3.1041 | 2.8676 | 0.3273 | 0.0016 | 0.3336  | 91.5174  |
|     | 55 | LAFSIW | 4.0026 | 3.7097 | 0.3360 | 0.0303 | 8.8582  | 13.7045  |

|    |    |          |        |        |        |        |          |          |
|----|----|----------|--------|--------|--------|--------|----------|----------|
| IV | 56 | GABGUN   | 3.4302 | 3.1563 | 0.3438 | 0.0066 | 2.5008   | 2.7322   |
|    | 57 | AEPCNQ10 | 2.6428 | 2.3990 | 0.3515 | 0.0506 | 0.9431   | 1.71994  |
|    | 58 | YOYVIR   | 2.5423 | 2.3024 | 0.3524 | 0.0006 | 7.3079   | 4.21608  |
|    | 59 | BARHEI   | 3.2695 | 2.9616 | 0.3771 | 0.0089 | 18.9907  | 32.4801  |
|    | 60 | EJINES   | 3.3311 | 3.0155 | 0.3807 | 0.0594 | 0.3633   | 3.4435   |
|    | 61 | CUTNOU   | 3.6324 | 3.2799 | 0.3979 | 0.0193 | 10.7455  | 57.6599  |
|    | 62 | CICGOK   | 3.2111 | 2.8964 | 0.3848 | 0.0401 | 5.3630   | 12.6641  |
|    | 63 | ZUBWAW   | 4.2448 | 3.8750 | 0.3871 | 0.0071 | 17.2435  | 38.6544  |
|    | 64 | LULSAM   | 3.3274 | 3.0038 | 0.3872 | 0.0199 | 40.7524  | 58.0128  |
|    | 65 | ZASLEK   | 3.5041 | 3.1691 | 0.3892 | 0.0071 | 0.2447   | 0.8969   |
|    | 66 | BARGOR   | 3.2970 | 2.9636 | 0.3962 | 0.0169 | 16.2726  | 30.4877  |
|    | 67 | JOFLAR   | 3.5527 | 3.2052 | 0.3971 | 0.02   | 56.5084  | 48.4960  |
|    | 68 | SIKTOV   | 3.5658 | 3.2261 | 0.3904 | 0.0368 | 2.3121   | 20.2008  |
| V  | 69 | MUKJOR   | 3.0946 | 3.0700 | 0.1603 | 0.007  | 0.0731   | 1.7041   |
|    | 70 | PATXEQ   | 3.1636 | 2.9752 | 0.2869 | 0.0187 | 2.0746   | 4.9876   |
|    | 71 | FEFNOW   | 3.9337 | 3.7971 | 0.2153 | 0.0264 | 19.0695  | 47.5328  |
|    | 72 | SELDOE01 | 3.3564 | 3.0681 | 0.3582 | 0.0221 | 0.7282   | 3.8215   |
|    | 73 | HAXHAQ   | 3.5886 | 3.4649 | 0.2189 | 0.0252 | 4.4031   | 4.0549   |
|    | 74 | KEGZOM   | 3.6906 | 3.3719 | 0.3689 | 0.098  | 5.0645   | 22.4231  |
|    | 75 | BIDZUK   | 3.8246 | 3.4712 | 0.3909 | 0.0892 | 4.4078   | 17.3947  |
|    | 76 | TOZZOZ   | 3.2342 | 3.1099 | 0.2335 | 0.0205 | 1.2540   | 3.6035   |
|    | 77 | WAPLIJ   | 4.3731 | 4.1053 | 0.3014 | 0.033  | 0.2379   | 2.9255   |
|    | 78 | BACTIL   | 3.4348 | 3.1910 | 0.3199 | 0.0003 | 2.2589   | 41.7745  |
|    | 79 | YAXKAM   | 3.5078 | 3.3839 | 0.2222 | 0.0017 | 0.9484   | 41.2355  |
|    | 80 | HECLIK   | 2.9420 | 2.7082 | 0.3316 | 0.0025 | 51.8665  | 1.0565   |
|    | 81 | YETCAB   | 2.4092 | 2.129  | 0.3896 | 0.0007 | 15.5082  | 467.8790 |
|    | 82 | GUMLEG   | 4.2757 | 3.9357 | 0.3623 | 0.038  | 3.1518   | 35.7817  |
|    | 83 | FURVIZ   | 2.8473 | 2.5546 | 0.3820 | 0.0157 | 3.3980   | 16.1047  |
|    | 84 | DARQIZ   | 2.6036 | 2.3198 | 0.3846 | 0.0268 | 126.4642 | 11.8778  |

|     |     |          |        |        |        |        |         |          |
|-----|-----|----------|--------|--------|--------|--------|---------|----------|
| V   | 85  | WOTCIR   | 3.4285 | 3.2886 | 0.2380 | 0.0334 | 0.7113  | 1.4792   |
|     | 86  | NACTEQ02 | 2.9413 | 2.8418 | 0.2256 | 0.0064 | 2.3325  | 7.3811   |
|     | 87  | LAHLAI   | 3.1287 | 3.0756 | 0.1814 | 0.0072 | 3.1282  | 10.4557  |
|     | 88  | BOCNEN   | 3.5787 | 3.437  | 0.2335 | 0.0096 | 1.1845  | 1.8193   |
|     | 89  | NOVXUT   | 2.6742 | 2.4546 | 0.3311 | 0.0435 | 1.8283  | 3.5292   |
|     | 90  | YAMVEQ   | 3.2032 | 3.0278 | 0.2751 | 0.0236 | 13.3261 | 3.71025  |
|     | 91  | PEQDEW   | 4.2214 | 3.9638 | 0.2994 | 0.016  | 0.6319  | 2.9695   |
|     | 92  | PEQDIA   | 4.2313 | 3.9729 | 0.2996 | 0.0339 | 0.8488  | 3.2459   |
|     | 93  | FEWBEO   | 3.7051 | 3.4001 | 0.3574 | 0.0391 | 7.1283  | 10.4074  |
|     | 94  | ZOXRIN   | 4.9668 | 4.6197 | 0.3404 | 0.0001 | 24.7212 | 14.5259  |
|     | 95  | TUCTAN   | 2.6339 | 2.6020 | 0.1844 | 0.0036 | 1.8356  | 10.8216  |
| VI  | 96  | VEBLIX   | 2.9198 | 2.6138 | 0.3896 | 0.066  | 1.1300  | 1.5207   |
|     | 97  | RIXDEH   | 2.7272 | 2.4190 | 0.3990 | 0.02   | 0.0044  | 0.0211   |
|     | 98  | HEXWIR   | 3.4219 | 3.1694 | 0.3273 | 0.0144 | 1.0740  | 0.0009   |
|     | 99  | GEHRIU   | 3.9560 | 3.6987 | 0.3097 | 0.0391 | 2.2480  | 2.9762   |
|     | 100 | NEYGIJ   | 4.1307 | 3.9605 | 0.2340 | 0.0114 | 3.2794  | 3.8390   |
|     | 101 | TOLPSO   | 4.1998 | 4.0228 | 0.2366 | 0.011  | 2.3883  | 4.7934   |
|     | 102 | RIXSIB   | 3.3903 | 3.2412 | 0.2468 | 0.0125 | 0.6319  | 2.9695   |
|     | 103 | UCOMIJ   | 4.0450 | 3.7081 | 0.3691 | 0.0182 | 7.9792  | 7.4403   |
|     | 104 | PEXZAY   | 3.1755 | 2.9055 | 0.3509 | 0.0279 | 2.4983  | 12.0160  |
|     | 105 | WAJPEC   | 3.3917 | 3.2628 | 0.2308 | 0.0183 | 0.4066  | 1.5145   |
|     | 106 | WAJPIG   | 3.5217 | 3.1975 | 0.3799 | 0.0297 | 3.6280  | 3.9100   |
| VII | 107 | DEJMUC   | 3.9049 | 3.6270 | 0.3281 | 0.0279 | 1.0369  | 5.7383   |
|     | 108 | JUNQUE   | 4.0545 | 3.7507 | 0.3426 | 0.0016 | 10.2473 | 9.5414   |
|     | 109 | LAHWUN   | 3.6412 | 3.4976 | 0.2325 | 0.0208 | 0.4643  | 1.6552   |
|     | 110 | TUFWAS   | 2.4635 | 2.226  | 0.3537 | 0.0098 | 2.2871  | 0.0003   |
|     | 111 | SIFHIY   | 3.0596 | 2.8720 | 0.2904 | 0.0003 | 26.7783 | 2.41E-10 |
|     | 112 | MOPKEI   | 2.6661 | 2.4026 | 0.3661 | 0.0225 | 8.0335  | 3.76E-05 |
|     | 113 | GOBVUP   | 2.6660 | 2.4300 | 0.3444 | 0.0161 | 8.6444  | 7.76E-11 |

|     |     |          |        |        |        |        |         |         |
|-----|-----|----------|--------|--------|--------|--------|---------|---------|
| VII | 114 | OJUSIV   | 2.8786 | 2.605  | 0.3656 | 0.0127 | 0.0923  | 38.3514 |
|     | 115 | KUSLUF01 | 2.9482 | 2.6562 | 0.3774 | 0.0014 | 11.5847 | 18.6231 |
|     | 116 | HAKSIW   | 3.5654 | 3.3281 | 0.3095 | 0.0674 | 1.2344  | 0.0034  |
|     | 117 | HAKSOC   | 3.5154 | 3.2753 | 0.3137 | 0.0599 | 0.9688  | 0.0005  |
|     | 118 | MUHTOZ   | 3.2464 | 2.9679 | 0.3548 | 0.0298 | 28.2311 | 0.1021  |
|     | 119 | MUHTIT   | 3.4398 | 3.2822 | 0.2516 | 0.0359 | 5.3611  | 0.0175  |
|     | 120 | ZERJEL02 | 3.5431 | 3.2497 | 0.3547 | 0.0585 | 11.5277 | 0.0045  |
|     | 121 | YAFNOI   | 3.1863 | 2.8590 | 0.3958 | 0.0804 | 1.6614  | 18.7244 |
|     | 122 | KAGCAW   | 3.2807 | 3.0109 | 0.3466 | 0.1534 | 0.9249  | 0.0014  |
|     | 123 | RAPGEV   | 3.1416 | 2.8235 | 0.3903 | 0.0005 | 0.6207  | 14.4760 |
|     | 124 | WEWHOV   | 3.8210 | 3.4859 | 0.3766 | 0.0349 | 3.5853  | 0.0073  |
|     | 125 | HIBZEZ   | 3.9162 | 3.6005 | 0.3575 | 0.0544 | 1.0723  | 38.8420 |

**Table S2.** The sketch of the 125 candidates. The structures are identified by their CSD ID.

| Type I | 1                                                                                   | 2                                                                                   | 3                                                                                    | 4                                                                                     |
|--------|-------------------------------------------------------------------------------------|-------------------------------------------------------------------------------------|--------------------------------------------------------------------------------------|---------------------------------------------------------------------------------------|
|        | 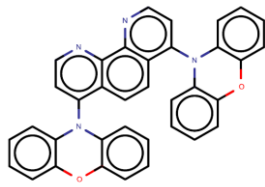   |    |    |    |
|        | <b>FARHEO</b>                                                                       | <b>HIFJOY</b>                                                                       | <b>EXAMUN</b>                                                                        | <b>TEGVAF</b>                                                                         |
|        | 5                                                                                   | 6                                                                                   | 7                                                                                    | 8                                                                                     |
|        |   |   |   |   |
|        | <b>IVETAG</b>                                                                       | <b>VENXAQ</b>                                                                       | <b>YUGDOV</b>                                                                        | <b>TESJEJ</b>                                                                         |
|        | 9                                                                                   | 10                                                                                  | 11                                                                                   | Type II 12                                                                            |
|        |  |  |  |  |
|        | <b>TURBOZ</b>                                                                       | <b>KETKAY</b>                                                                       | <b>BICQEM</b>                                                                        | <b>FECGOL</b>                                                                         |
|        | 13                                                                                  | 14                                                                                  | 15                                                                                   | 16                                                                                    |
|        |  |  |  |  |
|        | <b>ONAHIW</b>                                                                       | <b>IWOKUB</b>                                                                       | <b>SOHQAI</b>                                                                        | <b>XEXWIG</b>                                                                         |

|                                                                                                                                |                                                                                                                                |                                                                                                                                 |                                                                                                                                  |
|--------------------------------------------------------------------------------------------------------------------------------|--------------------------------------------------------------------------------------------------------------------------------|---------------------------------------------------------------------------------------------------------------------------------|----------------------------------------------------------------------------------------------------------------------------------|
| <p style="text-align: center;"><b>17</b></p> 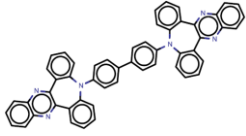 | <p style="text-align: center;"><b>18</b></p>  | <p style="text-align: center;"><b>19</b></p>  | <p style="text-align: center;"><b>20</b></p>  |
| <p style="text-align: center;"><b>TARNUW</b></p>                                                                               | <p style="text-align: center;"><b>VIHGAU</b></p>                                                                               | <p style="text-align: center;"><b>NUPJIR</b></p>                                                                                | <p style="text-align: center;"><b>RUPZIN</b></p>                                                                                 |
| <p style="text-align: center;"><b>Type III 21</b></p>                                                                          | <p style="text-align: center;"><b>22</b></p>                                                                                   | <p style="text-align: center;"><b>23</b></p>                                                                                    | <p style="text-align: center;"><b>24</b></p>                                                                                     |
|                                              |                                              |                                              |                                               |
| <p style="text-align: center;"><b>ILUBEY</b></p>                                                                               | <p style="text-align: center;"><b>NEWKEH</b></p>                                                                               | <p style="text-align: center;"><b>IKUZET</b></p>                                                                                | <p style="text-align: center;"><b>DELJIQ</b></p>                                                                                 |
| <p style="text-align: center;"><b>25</b></p>                                                                                   | <p style="text-align: center;"><b>26</b></p>                                                                                   | <p style="text-align: center;"><b>27</b></p>                                                                                    | <p style="text-align: center;"><b>28</b></p>                                                                                     |
|                                             |                                             |                                             |                                             |
| <p style="text-align: center;"><b>HATXOP</b></p>                                                                               | <p style="text-align: center;"><b>USINEQ</b></p>                                                                               | <p style="text-align: center;"><b>XOTCUF</b></p>                                                                                | <p style="text-align: center;"><b>WANTIQ</b></p>                                                                                 |
| <p style="text-align: center;"><b>29</b></p>                                                                                   | <p style="text-align: center;"><b>30</b></p>                                                                                   | <p style="text-align: center;"><b>31</b></p>                                                                                    | <p style="text-align: center;"><b>32</b></p>                                                                                     |
|                                             |                                             |                                             |                                             |
| <p style="text-align: center;"><b>VALTOT</b></p>                                                                               | <p style="text-align: center;"><b>NETZES</b></p>                                                                               | <p style="text-align: center;"><b>YAXXOK</b></p>                                                                                | <p style="text-align: center;"><b>OCUPEK</b></p>                                                                                 |

|                                                                                                                                  |                                                                                                                                          |                                                                                                                                   |                                                                                                                                    |
|----------------------------------------------------------------------------------------------------------------------------------|------------------------------------------------------------------------------------------------------------------------------------------|-----------------------------------------------------------------------------------------------------------------------------------|------------------------------------------------------------------------------------------------------------------------------------|
| <p style="text-align: center;"><b>33</b></p> 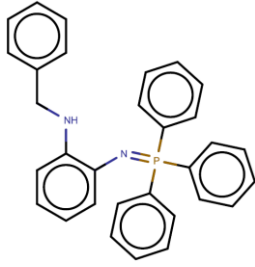   | <p style="text-align: center;"><b>34</b></p>            | <p style="text-align: center;"><b>35</b></p>    | <p style="text-align: center;"><b>36</b></p>    |
| <p style="text-align: center;"><b>PEHJUK</b></p>                                                                                 | <p style="text-align: center;"><b>KIRYEQ</b></p>                                                                                         | <p style="text-align: center;"><b>YOZFOI</b></p>                                                                                  | <p style="text-align: center;"><b>BUFFAJ</b></p>                                                                                   |
| <p style="text-align: center;"><b>37</b></p>    | <p style="text-align: center;"><b>38</b></p>           | <p style="text-align: center;"><b>39</b></p>    | <p style="text-align: center;"><b>40</b></p>    |
| <p style="text-align: center;"><b>TUWPOS</b></p>                                                                                 | <p style="text-align: center;"><b>NAYMIL</b></p>                                                                                         | <p style="text-align: center;"><b>NAYZOF</b></p>                                                                                  | <p style="text-align: center;"><b>TUWPEI</b></p>                                                                                   |
| <p style="text-align: center;"><b>41</b></p>  | <p style="text-align: center;"><b>Type IV 42</b></p>  | <p style="text-align: center;"><b>43</b></p>  | <p style="text-align: center;"><b>44</b></p>  |
| <p style="text-align: center;"><b>RALYIM</b></p>                                                                                 | <p style="text-align: center;"><b>PIVXUO</b></p>                                                                                         | <p style="text-align: center;"><b>ACUYOO</b></p>                                                                                  | <p style="text-align: center;"><b>PUWNAX</b></p>                                                                                   |
| <p style="text-align: center;"><b>45</b></p>  | <p style="text-align: center;"><b>46</b></p>          | <p style="text-align: center;"><b>47</b></p>  | <p style="text-align: center;"><b>48</b></p>  |
| <p style="text-align: center;"><b>FEJVAU</b></p>                                                                                 | <p style="text-align: center;"><b>VEPZOI</b></p>                                                                                         | <p style="text-align: center;"><b>XIDXUF</b></p>                                                                                  | <p style="text-align: center;"><b>CAGZES</b></p>                                                                                   |

|                                                                                                                                  |                                                                                                                                  |                                                                                                                                   |                                                                                                                                    |
|----------------------------------------------------------------------------------------------------------------------------------|----------------------------------------------------------------------------------------------------------------------------------|-----------------------------------------------------------------------------------------------------------------------------------|------------------------------------------------------------------------------------------------------------------------------------|
| <p style="text-align: center;"><b>49</b></p> 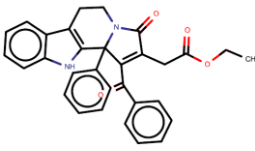   | <p style="text-align: center;"><b>50</b></p>    | <p style="text-align: center;"><b>51</b></p>    | <p style="text-align: center;"><b>52</b></p>    |
| <p style="text-align: center;"><b>CAGZAO</b></p>                                                                                 | <p style="text-align: center;"><b>RAFLOT</b></p>                                                                                 | <p style="text-align: center;"><b>NERLEE</b></p>                                                                                  | <p style="text-align: center;"><b>QETPEN</b></p>                                                                                   |
| <p style="text-align: center;"><b>53</b></p>   | <p style="text-align: center;"><b>54</b></p>    | <p style="text-align: center;"><b>55</b></p>   | <p style="text-align: center;"><b>56</b></p>   |
| <p style="text-align: center;"><b>LUBBAN</b></p>                                                                                 | <p style="text-align: center;"><b>YASRAM</b></p>                                                                                 | <p style="text-align: center;"><b>LAFSIW</b></p>                                                                                  | <p style="text-align: center;"><b>GABGUN</b></p>                                                                                   |
| <p style="text-align: center;"><b>57</b></p>  | <p style="text-align: center;"><b>58</b></p>  | <p style="text-align: center;"><b>59</b></p>  | <p style="text-align: center;"><b>60</b></p>  |
| <p style="text-align: center;"><b>AEPCNQ10</b></p>                                                                               | <p style="text-align: center;"><b>YOYVIR</b></p>                                                                                 | <p style="text-align: center;"><b>BARHEI</b></p>                                                                                  | <p style="text-align: center;"><b>EJINES</b></p>                                                                                   |
| <p style="text-align: center;"><b>61</b></p>  | <p style="text-align: center;"><b>62</b></p>  | <p style="text-align: center;"><b>63</b></p>  | <p style="text-align: center;"><b>64</b></p>  |
| <p style="text-align: center;"><b>CUTNOU</b></p>                                                                                 | <p style="text-align: center;"><b>CICGOK</b></p>                                                                                 | <p style="text-align: center;"><b>ZUBWAW</b></p>                                                                                  | <p style="text-align: center;"><b>LULSAM</b></p>                                                                                   |



|                                                                                                                                |                                                                                                                                |                                                                                                                                 |                                                                                                                                  |
|--------------------------------------------------------------------------------------------------------------------------------|--------------------------------------------------------------------------------------------------------------------------------|---------------------------------------------------------------------------------------------------------------------------------|----------------------------------------------------------------------------------------------------------------------------------|
| <p style="text-align: center;"><b>65</b></p> 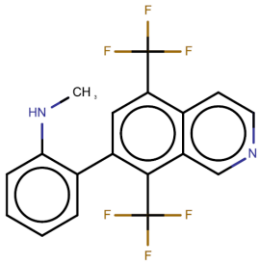 | <p style="text-align: center;"><b>66</b></p>  | <p style="text-align: center;"><b>67</b></p>  | <p style="text-align: center;"><b>68</b></p>  |
| <p style="text-align: center;"><b>ZASLEK</b></p>                                                                               | <p style="text-align: center;"><b>BARGOR</b></p>                                                                               | <p style="text-align: center;"><b>JOFLAR</b></p>                                                                                | <p style="text-align: center;"><b>SIKTOV</b></p>                                                                                 |
| <p style="text-align: center;"><b>Type V 69</b></p>                                                                            | <p style="text-align: center;"><b>70</b></p>                                                                                   | <p style="text-align: center;"><b>71</b></p>                                                                                    | <p style="text-align: center;"><b>72</b></p>                                                                                     |
|                                              |                                              |                                               |                                               |
| <p style="text-align: center;"><b>MUKJOR</b></p>                                                                               | <p style="text-align: center;"><b>PATXEQ</b></p>                                                                               | <p style="text-align: center;"><b>FEFNOW</b></p>                                                                                | <p style="text-align: center;"><b>SELDOE01</b></p>                                                                               |
| <p style="text-align: center;"><b>73</b></p>                                                                                   | <p style="text-align: center;"><b>74</b></p>                                                                                   | <p style="text-align: center;"><b>75</b></p>                                                                                    | <p style="text-align: center;"><b>76</b></p>                                                                                     |
|                                             |                                             |                                             |                                             |
| <p style="text-align: center;"><b>HAXHAQ</b></p>                                                                               | <p style="text-align: center;"><b>KEGZOM</b></p>                                                                               | <p style="text-align: center;"><b>BIDZUK</b></p>                                                                                | <p style="text-align: center;"><b>TOZZOZ</b></p>                                                                                 |
| <p style="text-align: center;"><b>77</b></p>                                                                                   | <p style="text-align: center;"><b>78</b></p>                                                                                   | <p style="text-align: center;"><b>79</b></p>                                                                                    |                                                                                                                                  |
|                                             |                                             |                                             |                                             |
| <p style="text-align: center;"><b>WAPLIJ</b></p>                                                                               | <p style="text-align: center;"><b>BACTIL</b></p>                                                                               | <p style="text-align: center;"><b>YAXKAM</b></p>                                                                                | <p style="text-align: center;"><b>HECLIK</b></p>                                                                                 |

|                                                                                                                                  |                                                                                                                                  |                                                                                                                                   |                                                                                                                                            |
|----------------------------------------------------------------------------------------------------------------------------------|----------------------------------------------------------------------------------------------------------------------------------|-----------------------------------------------------------------------------------------------------------------------------------|--------------------------------------------------------------------------------------------------------------------------------------------|
| <p style="text-align: center;"><b>81</b></p> 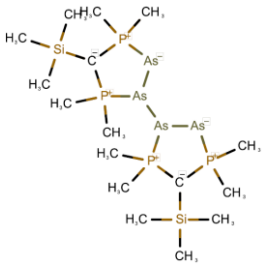   | <p style="text-align: center;"><b>82</b></p>    | <p style="text-align: center;"><b>83</b></p>    | <p style="text-align: center;"><b>84</b></p>            |
| <p style="text-align: center;"><b>YETCAB</b></p>                                                                                 | <p style="text-align: center;"><b>GUMLEG</b></p>                                                                                 | <p style="text-align: center;"><b>FURVIZ</b></p>                                                                                  | <p style="text-align: center;"><b>DARQIZ</b></p>                                                                                           |
| <p style="text-align: center;"><b>85</b></p>   | <p style="text-align: center;"><b>86</b></p>    | <p style="text-align: center;"><b>87</b></p>    | <p style="text-align: center;"><b>88</b></p>           |
| <p style="text-align: center;"><b>WOTCIR</b></p>                                                                                 | <p style="text-align: center;"><b>NACTEQ02</b></p>                                                                               | <p style="text-align: center;"><b>LAHLAI</b></p>                                                                                  | <p style="text-align: center;"><b>BOCNEN</b></p>                                                                                           |
| <p style="text-align: center;"><b>89</b></p>  | <p style="text-align: center;"><b>90</b></p>  | <p style="text-align: center;"><b>91</b></p>  | <p style="text-align: center;"><b>92</b></p>          |
| <p style="text-align: center;"><b>NOVXUT</b></p>                                                                                 | <p style="text-align: center;"><b>YAMVEQ</b></p>                                                                                 | <p style="text-align: center;"><b>PEQDIA</b></p>                                                                                  | <p style="text-align: center;"><b>PEQDEW</b></p>                                                                                           |
| <p style="text-align: center;"><b>93</b></p>  | <p style="text-align: center;"><b>94</b></p>  | <p style="text-align: center;"><b>95</b></p>  | <p style="text-align: center;"><b>Type VI 96</b></p>  |
| <p style="text-align: center;"><b>FEWBEO</b></p>                                                                                 | <p style="text-align: center;"><b>ZOXRIN</b></p>                                                                                 | <p style="text-align: center;"><b>TUCTAN</b></p>                                                                                  | <p style="text-align: center;"><b>VEBLIX</b></p>                                                                                           |

|                                                                                                                                   |                                                                                                                                            |                                                                                                                                    |                                                                                                                                     |
|-----------------------------------------------------------------------------------------------------------------------------------|--------------------------------------------------------------------------------------------------------------------------------------------|------------------------------------------------------------------------------------------------------------------------------------|-------------------------------------------------------------------------------------------------------------------------------------|
| <p style="text-align: center;"><b>97</b></p> 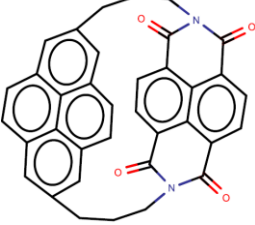    | <p style="text-align: center;"><b>98</b></p>              | <p style="text-align: center;"><b>99</b></p>     | <p style="text-align: center;"><b>100</b></p>    |
| <p style="text-align: center;"><b>RIXDEH</b></p>                                                                                  | <p style="text-align: center;"><b>HEXWIR</b></p>                                                                                           | <p style="text-align: center;"><b>GEHRIU</b></p>                                                                                   | <p style="text-align: center;"><b>NEYGIJ</b></p>                                                                                    |
| <p style="text-align: center;"><b>101</b></p>   | <p style="text-align: center;"><b>102</b></p>            | <p style="text-align: center;"><b>103</b></p>   | <p style="text-align: center;"><b>104</b></p>   |
| <p style="text-align: center;"><b>TOLPSO</b></p>                                                                                  | <p style="text-align: center;"><b>RIXSIB</b></p>                                                                                           | <p style="text-align: center;"><b>UCOMIJ</b></p>                                                                                   | <p style="text-align: center;"><b>PEXZAY</b></p>                                                                                    |
| <p style="text-align: center;"><b>105</b></p>  | <p style="text-align: center;"><b>106</b></p>           | <p style="text-align: center;"><b>107</b></p>  | <p style="text-align: center;"><b>108</b></p>  |
| <p style="text-align: center;"><b>WAJPEC</b></p>                                                                                  | <p style="text-align: center;"><b>WAJPIG</b></p>                                                                                           | <p style="text-align: center;"><b>DEJMUC</b></p>                                                                                   | <p style="text-align: center;"><b>JUNQUE</b></p>                                                                                    |
| <p style="text-align: center;"><b>109</b></p>  | <p style="text-align: center;"><b>Type VII 110</b></p>  | <p style="text-align: center;"><b>111</b></p>  | <p style="text-align: center;"><b>112</b></p>  |
| <p style="text-align: center;"><b>LAHWUN</b></p>                                                                                  | <p style="text-align: center;"><b>TUFWAS</b></p>                                                                                           | <p style="text-align: center;"><b>SIFHIY</b></p>                                                                                   | <p style="text-align: center;"><b>MOPKEI</b></p>                                                                                    |

|                                                                                                                                   |                                                                                                                                   |                                                                                                                                    |                                                                                                                                     |
|-----------------------------------------------------------------------------------------------------------------------------------|-----------------------------------------------------------------------------------------------------------------------------------|------------------------------------------------------------------------------------------------------------------------------------|-------------------------------------------------------------------------------------------------------------------------------------|
| <p style="text-align: center;"><b>113</b></p> 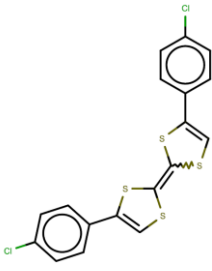   | <p style="text-align: center;"><b>114</b></p>    | <p style="text-align: center;"><b>115</b></p>    | <p style="text-align: center;"><b>116</b></p>    |
| <p style="text-align: center;"><b>GOBVUP</b></p>                                                                                  | <p style="text-align: center;"><b>OJUSIV</b></p>                                                                                  | <p style="text-align: center;"><b>KUSLUF01</b></p>                                                                                 | <p style="text-align: center;"><b>HAKSIW</b></p>                                                                                    |
| <p style="text-align: center;"><b>117</b></p>    | <p style="text-align: center;"><b>118</b></p>    | <p style="text-align: center;"><b>119</b></p>    | <p style="text-align: center;"><b>120</b></p>    |
| <p style="text-align: center;"><b>HAKSOC</b></p>                                                                                  | <p style="text-align: center;"><b>MUHTOZ</b></p>                                                                                  | <p style="text-align: center;"><b>MUHTIT</b></p>                                                                                   | <p style="text-align: center;"><b>ZERJEL02</b></p>                                                                                  |
| <p style="text-align: center;"><b>121</b></p>  | <p style="text-align: center;"><b>122</b></p>  | <p style="text-align: center;"><b>123</b></p>  | <p style="text-align: center;"><b>124</b></p>  |
| <p style="text-align: center;"><b>YAFNOI</b></p>                                                                                  | <p style="text-align: center;"><b>KAGCAW</b></p>                                                                                  | <p style="text-align: center;"><b>RAPGEV</b></p>                                                                                   | <p style="text-align: center;"><b>WEWHOV</b></p>                                                                                    |
| <p style="text-align: center;"><b>125</b></p>  |                                                                                                                                   |                                                                                                                                    |                                                                                                                                     |
| <p style="text-align: center;"><b>HIBZEZ</b></p>                                                                                  |                                                                                                                                   |                                                                                                                                    |                                                                                                                                     |

## References

1. M. Montalti, A. Credi, L. Prodi and M. Gandolfi, Handbook of Photochemistry, CRC Press, Boca Raton, 3rd edn, 2006.
2. R. Grotjahn, T. M. Maier, J. Michl and M. Kaupp, *J. Chem. Theory Comput.*, 2017, **13**, 4984-4996.
3. D. Padula, Ö. H. Omar, T. Nematiram and A. Troisi, *Energy Environ. Sci.*, 2019, **12**, 2412-2416.
